# Supplementary material for: Patients’ Perspectives on Determinants Avoidable Hospitalizations: Development and Validation of a Questionnaire
Source: MDPI journal article supplement (doi:10.3390/ijerph19053138), 2022-03-07
Supplement: s1 [file s1]

Good morning/good afternoon,

| Individual | Not important | A Little Important | Not very nor Important | Little Important | Very Important | Do not Know/<br>Do not Respond |
|------------|---------------|--------------------|------------------------|------------------|----------------|--------------------------------|
|------------|---------------|--------------------|------------------------|------------------|----------------|--------------------------------|

[illegible]
